# Supplementary material
Source: Springer Nature journal article supplement (https://www.springermedizin.de/resource/supplementary/12905_2013_392_MOESM4_ESM.pdf/9518666)
Supplement: MOESM4 [file 9518666]

# of surveys/interviews  
including attribute group  
(out of 20)

# of DAs  
including attribute group  
(out of 19)

|                      |                                    | # of surveys/interviews<br>including attribute group<br>(out of 20) | # of DAs<br>including attribute group<br>(out of 19) |
|----------------------|------------------------------------|---------------------------------------------------------------------|------------------------------------------------------|
| Mechanistic          | Ease of use                        | 0                                                                   | 0                                                    |
|                      | Probability of omission            | 0                                                                   | 1                                                    |
|                      | How used                           | 0                                                                   | 1                                                    |
|                      | Frequency of use                   | 1                                                                   | 1                                                    |
|                      | Return to fertility                | 1                                                                   | 1                                                    |
|                      | Effect latency                     | 0                                                                   | 1                                                    |
|                      | Foreign body phobia                | 0                                                                   | 1                                                    |
|                      | Needle phobia                      | 0                                                                   | 1                                                    |
|                      | Use of hormones                    | 0                                                                   | 1                                                    |
|                      | Requirement of healthcare provider | 0                                                                   | 1                                                    |
|                      | Post-coital                        | 0                                                                   | 1                                                    |
|                      | Pre-sex preparation                | 0                                                                   | 1                                                    |
| Method Effect        | Efficacy                           | 1                                                                   | 1                                                    |
|                      | Maximizing Efficacy                | 0                                                                   | 1                                                    |
|                      | STI prevention                     | 0                                                                   | 1                                                    |
|                      | Side effects/Health risks          | 1                                                                   | 1                                                    |
|                      | Noncontraceptive benefits          | 0                                                                   | 1                                                    |
|                      | Menstrual changes                  | 0                                                                   | 1                                                    |
|                      | Postpartum compatibility           | 0                                                                   | 1                                                    |
|                      | Alarm signs                        | 0                                                                   | 1                                                    |
| Social/<br>Normative | Partner support                    | 0                                                                   | 1                                                    |
|                      | Prior experience                   | 0                                                                   | 1                                                    |
|                      | Vicarious experience               | 1                                                                   | 1                                                    |
|                      | Expectations                       | 0                                                                   | 1                                                    |
|                      | Religions/moral considerations     | 0                                                                   | 1                                                    |
|                      | Concealability                     | 0                                                                   | 1                                                    |
|                      | Reputation                         | 1                                                                   | 1                                                    |
| Practical            | Requires parental consent          | 0                                                                   | 1                                                    |
|                      | Cost (financial)                   | 0                                                                   | 1                                                    |
|                      | Effect on sexual pleasure          | 0                                                                   | 1                                                    |
|                      | Availability                       | 0                                                                   | 1                                                    |
|                      | Level of sexual activity           | 0                                                                   | 1                                                    |
